# Supplementary material for: Molecular Characterization of Associated Pathogens in Febrile Patients during Inter-Epidemic Periods of Urban Arboviral Diseases in Tapachula Southern Mexico
Source: MDPI journal article supplement (doi:10.3390/pathogens10111450), 2021-11-08
Supplement: s1 [file s1]

Table S1. Demographic data of the 253 patients included in this study.

| Population Data                                                          | N (%)       | DENV (%) | CHIK (%)    | ZIKA (%)  | CHIK/ZIKA (%) | Leptospira (%) | Total Positives (%) |
|--------------------------------------------------------------------------|-------------|----------|-------------|-----------|---------------|----------------|---------------------|
| April–June 2015                                                          |             |          |             |           |               |                |                     |
| Age Group                                                                |             |          |             |           |               |                |                     |
| 0–20                                                                     | 19 (7.51)   | 1 (0.40) | 16 (6.32)   | 0 (0)     | 0 (0)         | 0 (0)          | 17 (6.71)           |
| 21–30                                                                    | 30 (11.86)  | 0 (0)    | 27 (10.67)  | 1 (0.40)  | 0 (0)         | 0 (0)          | 28 (11.07)          |
| 31–40                                                                    | 45 (17.79)  | 0 (0)    | 40 (15.81)  | 5 (1.98)  | 0 (0)         | 0 (0)          | 45 (17.79)          |
| 41–50                                                                    | 64 (25.30)  | 0 (0)    | 58 (22.92)  | 4 (1.58)  | 0 (0)         | 2 (0.79)       | 64 (25.30)          |
| >50                                                                      | 48 (18.97)  | 0 (0)    | 42 (16.60)  | 2 (0.79)  | 0 (0)         | 1 (0.40)       | 45 (17.79)          |
| Subtotal                                                                 | 206 (81.42) | 1 (0.40) | 184 (72.73) | 12 (4.74) | 0 (0)         | 3 (1.19)       | 200 (79.05)         |
| Gender                                                                   |             |          |             |           |               |                |                     |
| Female                                                                   | 138 (54.55) | 1 (0.40) | 125 (49.41) | 7 (2.77)  | 0 (0)         | 3 (1.19)       | 136 (53.75)         |
| Male                                                                     | 68 (26.88)  | 0 (0)    | 58 (22.92)  | 5 (1.98)  | 0 (0)         | 0 (0)          | 63 (24.90)          |
| February–March 2016                                                      |             |          |             |           |               |                |                     |
| Age Group                                                                |             |          |             |           |               |                |                     |
| 0–20                                                                     | 7 (2.77)    | 0 (0)    | 2 (0.79)    | 3 (1.19)  | 0 (0)         | 2 (0.79)       | 7 (2.77)            |
| 21–30                                                                    | 13 (5.14)   | 0 (0)    | 2 (0.79)    | 5 (1.98)  | 1 (0.40)      | 2 (0.79)       | 10 (3.95)           |
| 31–40                                                                    | 11 (4.35)   | 0 (0)    | 2 (0.79)    | 4 (1.58)  | 1 (0.40)      | 0 (0)          | 7 (2.77)            |
| 41–50                                                                    | 8 (3.16)    | 0 (0)    | 0 (0)       | 4 (1.58)  | 2 (0.79)      | 0 (0)          | 6 (2.37)            |
| >50                                                                      | 8 (3.16)    | 0 (0)    | 0 (0)       | 6 (2.37)  | 1 (0.40)      | 1 (0.40)       | 8 (3.16)            |
| Subtotal                                                                 | 47 (18.58)  | 0 (0)    | 6 (2.37)    | 22 (8.69) | 5 (1.98)      | 5 (1.98)       | 38 (15.01)          |
| Gender                                                                   |             |          |             |           |               |                |                     |
| Female                                                                   | 31 (12.25)  | 0 (0)    | 5 (1.98)    | 13 (5.13) | 3 (1.19)      | 3 (1.19)       | 24 (9.48)           |
| Male                                                                     | 16 (6.32)   | 0 (0)    | 1 (0.40)    | 9 (3.56)  | 2 (0.79)      | 2 (0.79)       | 14 (5.53)           |
| Total Women, 169 (66.8); Total Mens, 84 (33.2); Global Total, 253 (100). |             |          |             |           |               |                |                     |

Table S2. Demographic information of pathogen localities in febrile patients.

| Collection Site     | Samples Collected, No. |                    |                   |                                      |                         |                   |
|---------------------|------------------------|--------------------|-------------------|--------------------------------------|-------------------------|-------------------|
|                     | Samples Collected, No. | Positive for CHIKV | Positive for ZIKV | co-Infection Positive for CHIKV/ZIKV | Positive for Leptospira | Positive for DENV |
| Acacoyagua          | 1                      | 1                  | –                 | –                                    | –                       | –                 |
| Cacahoatan          | 23                     | 18                 | 4                 | –                                    | –                       | –                 |
| Huehuetan           | 24                     | 20                 | 3                 | –                                    | 1                       | –                 |
| Huixtla             | 23                     | 20                 | 1                 | –                                    | –                       | –                 |
| Mazatan             | 2                      | 2                  | 0                 | –                                    | –                       | –                 |
| Metapa de Dominguez | 1                      | 1                  | 0                 | –                                    | –                       | –                 |
| Suchiate            | 4                      | 4                  | 0                 | –                                    | –                       | –                 |
| Tapachula           | 132                    | 91                 | 22                | 3                                    | 6                       | 1                 |
| Tuxtla Chico        | 39                     | 30                 | 3                 | 2                                    | 1                       | –                 |
| Tuzantan            | 2                      | 1                  | 1                 | –                                    | –                       | –                 |
| Villa Comaltitlan   | 2                      | 1                  | 0                 | –                                    | –                       | –                 |
| <b>Gender</b>       |                        |                    |                   |                                      |                         |                   |
| Female              | 169                    | 130                | 20                | 3                                    | 6                       | 1                 |
| Male                | 84                     | 59                 | 14                | 2                                    | 2                       |                   |
| <b>Total</b>        | <b>253</b>             | <b>189</b>         | <b>34</b>         | <b>5</b>                             | <b>8</b>                | <b>1</b>          |

Table S3. Comparison of clinical variables between the CHIKV and ZIKV groups.

| <b>SYMPTOM</b>             | <b>ZIKV+ / n=35 (%)</b> | <b>CHIKV+ / n=189 (%)</b> | <b><sup>a</sup> <i>p</i>-Value</b> |
|----------------------------|-------------------------|---------------------------|------------------------------------|
| Headache                   | 33 (94.3)               | 173 (91.5)                | 0.746                              |
| Myalgia *                  | 23 (65.7)               | 22 (11.6)                 | <0.01                              |
| Mild-Moderate Arthralgia * | 25 (71.4)               | 76 (40.2)                 | <0.01                              |
| Severe Polyarthralgia *    | 10 (28.6)               | 112 (59.3)                | <0.01                              |
| Arthritis *                | 6 (17.1)                | 103 (54.5)                | <0.01                              |
| Retroocular Pain *         | 18 (51.4)               | 30 (15.9)                 | <0.01                              |
| Exanthema *                | 21 (60.0)               | 151 (79.9)                | <0.01                              |
| Pruritus                   | 22 (62.9)               | 138 (73.0)                | 0.227                              |
| Vomit                      | 3 (8.6)                 | 27 (14.3)                 | 0.588                              |
| Sickness                   | 23 (65.7)               | 116 (61.4)                | 0.707                              |
| Shivers                    | 32 (91.4)               | 175 (92.6)                | 0.734                              |
| Photophobia                | 1 (2.9)                 | 2 (1.1)                   | 0.401                              |
| Abdominal Pain             | 11 (31.4)               | 81 (42.9)                 | 0.262                              |
| Diarrhea                   | 9 (25.7)                | 73 (38.6)                 | 0.182                              |
| Conjunctivitis *           | 25 (71.4)               | 20 (10.6)                 | <0.01                              |
| Nasal Congestion           | 8 (22.9)                | 24 (12.7)                 | 0.12                               |
| Cough *                    | 15 (42.9)               | 34 (18.0)                 | <0.01                              |
| Pharyngitis                | 11 (31.4)               | 70 (37.0)                 | 0.571                              |
| Taste Alteration *         | 15 (42.9)               | 150 (79.4)                | <0.01                              |
| Adenomegaly *              | 9 (25.7)                | 85 (45.0)                 | <0.05                              |
| Inflammation Of The Eyelid | 3 (8.6)                 | 8 (4.2)                   | 0.384                              |

|                    |          |           |       |
|--------------------|----------|-----------|-------|
| Dyspnoea           | 3 (8.6)  | 6 (3.2)   | 0.151 |
| Cardiac Alteration | 0 (0)    | 2 (1.1)   | 1     |
| Disorientation     | 0 (0)    | 1 (0.5)   | 1     |
| Muscular Weakness  | 4 (11.4) | 30 (15.9) | 0.615 |
| Otitis             | 0 (0)    | 1 (0.5)   | 1     |
| Petequias          | 1 (2.9)  | 2 (1.1)   | 0.401 |
| Edema *            | 5 (14.3) | 70 (37.0) | <0.05 |

| Lanciotti et al (2008) | Primer sentido (ZIKV 1086) |   |   |   |   |   |   |   |   |   | Sonda (ZIKV 1107) |   |   |   |   |   |   |   |   |   | Primer anti-sentido (ZIKV 1162c) |   |   |   |   |   |   |   |   |   |   |   |   |   |   |   |   |   |   |   |   |   |   |   |   |   |   |   |   |   |   |   |   |   |   |   |   |   |   |   |   |   |   |   |   |   |   |   |
|------------------------|----------------------------|---|---|---|---|---|---|---|---|---|-------------------|---|---|---|---|---|---|---|---|---|----------------------------------|---|---|---|---|---|---|---|---|---|---|---|---|---|---|---|---|---|---|---|---|---|---|---|---|---|---|---|---|---|---|---|---|---|---|---|---|---|---|---|---|---|---|---|---|---|---|---|
|                        | C                          | C | G | C | T | G | C | C | C | A | A                 | C | A | C | A | A | G | A | G | C | C                                | T | T | G | A | C | A | A | G | C | A | G | T | C | A | G | A | C | A | C | T | C | A | A | A | T | G | T | C | T | G | C | A | A | A | G | A | A | C | G | T | T | A | G | T | G | G |   |
| BrazilAmniotic2015     | C                          | C | G | C | T | G | C | C | C | A | A                 | C | A | C | A | A | G | A | G | C | C                                | T | T | G | A | C | A | A | G | C | A | A | T | C | A | G | A | C | A | C | T | C | A | A | A | T | G | T | C | T | G | C | A | A | A | G | A | A | C | G | T | T | A | G | T | G | G |   |
| BrazilBrain2015        | C                          | C | G | C | T | G | C | C | C | A | A                 | C | A | C | A | A | G | A | G | C | C                                | T | T | G | A | C | A | A | G | C | A | A | T | C | A | G | A | C | A | C | T | C | A | A | A | T | G | T | C | T | G | C | A | A | A | G | A | A | C | G | T | T | A | G | T | G | G |   |
| Brazil2015_1           | C                          | C | G | C | T | G | C | C | C | A | A                 | C | A | C | A | A | G | A | G | C | C                                | T | T | G | A | C | A | A | G | C | A | A | T | C | A | G | A | C | A | C | T | C | A | A | A | T | G | T | C | T | G | C | A | A | A | G | A | A | C | G | T | T | A | G | T | G | G |   |
| Brazil2015_2           | C                          | C | G | C | T | G | C | C | C | A | A                 | C | A | C | A | A | G | A | G | C | C                                | T | T | G | A | C | A | A | G | C | A | A | T | C | A | G | A | C | A | C | T | C | A | A | A | T | G | T | C | T | G | C | A | A | A | G | A | A | C | G | T | T | A | G | T | G | G |   |
| Brazil2015_3           | C                          | C | G | C | T | G | C | C | C | A | A                 | C | A | C | A | A | G | A | G | C | C                                | T | T | G | A | C | A | A | G | C | A | A | T | C | A | G | A | C | A | C | T | C | A | A | A | T | G | T | C | T | G | C | A | A | A | G | A | A | C | G | T | T | A | G | T | G | G |   |
| Brazil2015_4           | C                          | C | G | C | T | G | C | C | C | A | A                 | C | A | C | A | A | G | A | G | C | C                                | T | T | G | A | C | A | A | G | C | A | A | T | C | A | G | A | C | A | C | T | C | A | A | A | T | G | T | C | T | G | C | A | A | A | G | A | A | C | G | T | T | A | G | T | G | G |   |
| Brazil2015_5           | C                          | C | G | C | T | G | C | C | C | A | A                 | C | A | C | A | A | G | A | G | C | C                                | T | T | G | A | C | A | A | G | C | A | A | T | C | A | G | A | C | A | C | T | C | A | A | A | T | G | T | C | T | G | C | A | A | A | G | A | A | C | G | T | T | A | G | T | G | G |   |
| Cambodia2010           | C                          | C | G | C | T | G | C | C | C | A | A                 | C | A | C | A | A | G | A | G | C | C                                | T | T | G | A | C | A | A | G | C | A | A | T | C | A | G | A | C | A | C | T | C | A | A | A | T | G | T | C | T | G | C | A | A | A | G | A | A | C | G | T | T | A | G | T | G | G |   |
| CAR1968                | T                          | C | G | C | T | G | C | C | C | A | A                 | C | A | C | A | A | G | A | G | C | C                                | T | T | G | A | C | A | A | G | C | A | A | T | C | A | G | A | C | A | C | T | C | A | A | A | T | G | T | T | G | C | A | A | A | G | A | A | C | A | T | T | G | G | T | G | G |   |   |
| CAR1976                | T                          | C | G | C | T | G | C | C | C | A | A                 | C | A | C | A | A | G | A | G | C | C                                | T | T | G | A | T | A | A | G | C | A | A | T | C | A | G | A | C | A | C | C | C | A | A | A | T | G | T | G | T | G | C | A | A | A | G | A | A | C | A | T | T | G | G | T | G | G |   |
| CAR1979                | T                          | C | G | C | T | G | C | C | C | A | A                 | C | A | C | A | A | G | A | G | C | C                                | T | T | G | A | T | A | A | G | C | A | A | T | C | A | G | A | C | A | C | C | C | A | A | A | T | G | T | G | T | G | C | A | A | A | G | A | A | C | A | T | T | G | G | T | G | G |   |
| CAR1980                | T                          | C | G | C | T | G | C | C | C | A | A                 | C | A | C | A | A | G | A | G | C | C                                | T | T | G | A | C | A | A | G | C | A | A | T | C | A | G | A | C | A | C | T | C | A | A | A | T | G | T | A | T | G | C | A | A | A | G | A | A | C | A | T | T | G | G | T | G | G |   |
| FrenchPolynesia2013    | C                          | C | G | C | T | G | C | C | C | A | A                 | C | A | C | A | A | G | A | G | C | C                                | T | T | G | A | C | A | A | G | C | A | A | T | C | A | G | A | C | A | C | T | C | A | A | A | T | G | T | C | T | G | C | A | A | A | G | A | A | C | G | T | T | A | G | T | G | G |   |
| Guatemala2015_1        | C                          | C | G | C | T | G | C | C | C | A | A                 | C | A | C | A | A | G | A | G | C | C                                | T | T | G | A | C | A | A | G | C | A | A | T | C | A | G | A | C | A | C | T | C | A | A | A | T | G | T | C | T | G | C | A | A | A | G | A | A | C | G | T | T | A | G | T | G | G |   |
| Guatemala2015_2        | C                          | C | G | C | T | G | C | C | C | A | A                 | C | A | C | A | A | G | A | G | C | C                                | T | T | G | A | C | A | A | G | C | A | A | T | C | A | G | A | C | A | C | T | C | A | A | A | T | G | T | C | T | G | C | A | A | A | G | A | A | C | G | T | T | A | G | T | G | G |   |
| Haiti2014              | C                          | C | G | C | T | G | C | C | C | A | A                 | C | A | C | A | A | G | A | G | C | C                                | T | T | G | A | C | A | A | G | C | A | A | T | C | A | G | A | C | A | C | T | C | A | A | A | T | G | T | C | T | G | C | A | A | A | G | A | A | C | G | T | T | A | G | T | G | G |   |
| Malaysia1966           | C                          | C | G | C | T | G | C | C | C | A | A                 | C | A | C | A | A | G | A | G | C | C                                | T | T | G | A | C | A | A | G | C | A | A | G | T | C | A | G | A | C | A | C | T | C | A | A | A | T | G | T | T | G | C | A | A | A | G | A | A | C | G | T | T | A | G | T | G | G |   |
| Martinique2015         | C                          | C | G | C | T | G | C | C | C | A | A                 | C | A | C | A | A | G | A | G | C | C                                | T | T | G | A | C | A | A | G | C | A | A | T | C | A | G | A | C | A | C | T | C | A | A | A | T | G | T | C | T | G | C | A | A | A | G | A | A | C | G | T | T | A | G | T | G | G |   |
| Nigeria1968            | T                          | C | G | C | T | G | C | C | C | A | A                 | C | A | C | A | A | G | A | G | C | C                                | T | T | G | A | C | A | A | G | C | A | A | G | T | C | A | G | A | C | A | C | T | C | A | A | A | T | G | T | C | T | G | T | A | A | A | G | A | A | C | A | T | T | G | G | T | G | G |
| Philippines2012        | C                          | C | G | C | T | G | C | C | C | A | A                 | C | A | C | A | A | G | A | G | C | C                                | T | T | G | A | C | A | A | G | C | A | A | G | T | C | A | G | A | C | A | C | T | C | A | A | A | T | G | T | C | T | G | C | A | A | A | G | A | A | C | G | T | T | A | G | T | G | G |
| PuertoRico2015         | C                          | C | G | C | T | G | C | C | C | A | A                 | C | A | C | A | A | G | A | G | C | C                                | T | T | G | A | C | A | A | G | C | A | A | T | C | A | G | A | C | A | C | T | C | A | A | A | T | G | T | C | T | G | C | A | A | A | G | A | A | C | G | T | T | A | G | T | G | G |   |
| SaoPaulo2015           | C                          | C | G | C | T | G | C | C | C | A | A                 | C | A | C | A | A | G | A | G | C | C                                | T | T | G | A | C | A | A | G | C | A | A | T | C | A | G | A | C | A | C | T | C | A | A | A | T | G | T | C | T | G | C | A | A | A | G | A | A | C | G | T | T | A | G | T | G | G |   |
| Senegal1968            | C                          | C | G | C | T | G | T | C | C | A | A                 | C | A | C | A | A | G | A | G | C | C                                | T | T | G | A | C | A | A | G | C | A | A | G | T | C | A | G | A | C | A | C | T | C | A | A | A | T | G | T | C | T | G | C | A | A | G | A | A | C | A | T | T | G | G | T | G | G |   |
| Senegal1984            | C                          | C | G | T | T | G | T | C | C | A | A                 | C | A | C | A | A | G | A | G | C | C                                | T | T | G | A | C | A | A | G | C | A | A | G | T | C | A | G | A | C | A | C | T | C | A | A | A | T | G | T | C | T | G | C | A | A | A | G | A | A | C | A | T | T | G | G | T | G | G |
| Senegal1997            | C                          | C | G | C | T | G | T | C | C | A | A                 | C | A | C | A | A | G | A | G | C | C                                | T | T | G | A | C | A | A | G | C | A | A | T | C | A | G | A | C | A | C | T | C | A | A | A | T | G | T | C | T | G | C | A | A | A | G | A | A | C | A | T | T | A | G | T | G | G |   |
| Senegal2001            | T                          | C | G | T | T | G | C | C | C | A | A                 | C | A | C | A | A | G | A | G | C | C                                | T | T | G | A | C | A | A | G | C | A | A | T | C | A | G | A | C | A | C | T | C | A | A | A | T | G | T | C | T | G | C | A | A | A | G | A | A | C | A | T | T | A | G | T | G | G |   |
| Suriname2015           | C                          | C | G | C | T | G | C | C | C | A | A                 | C | A | C | A | A | G | A | G | C | C                                | T | T | G | A | C | A | A | G | C | A | A | T | C | A | G | A | C | A | C | T | C | A | A | A | T | G | T | C | T | G | C | A | A | A | G | A | A | C | G | T | T | A | G | T | G | G |   |
| Thailand2013           | C                          | C | G | C | T | G | C | C | C | A | A                 | C | A | C | A | A | G | A | G | C | C                                | T | T | G | A | C | A | A | G | C | A | A | T | C | A | G | A | C | A | C | T | C | A | A | A | T | G | T | C | T | G | C | A | A | A | G | A | A | C | G | T | T | A | G | T | G | G |   |
| Thailand2014           | C                          | C | G | C | T | G | C | C | C | A | A                 | C | A | C | A | A | G | A | G | C | C                                | T | T | G | A | C | A | A | G | C | A | A | T | C | A | G | A | C | A | C | T | C | A | A | A | T | G | T | C | T | G | C | A | A | A | G | A | A | C | G | T | T | A | G | T | G | G |   |
| Uganda1947_1           | T                          | C | G | T | T | G | C | C | C | A | A                 | C | A | C | A | A | G | A | G | C | C                                | T | T | G | A | C | A | A | G | C | A | A | T | C | A | G | A | C | A | C | T | C | A | A | A | T | G | T | C | T | G | C | A | A | A | G | A | A | C | A | T | T | A | G | T | G | G |   |
| Uganda1947_2           | T                          | C | G | T | T | G | C | C | C | A | A                 | C | A | C | A | A | G | A | G | C | C                                | T | T | G | A | C | A | A | G | C | A | A | T | C | A | G | A | C | A | C | T | C | A | A | A | T | G | T | C | T | G | C | A | A | A | G | A | A | C | A | T | T | A | G | T | G | G |   |
| Yap2007                | C                          | C | G | C | T | G | C | C | C | A | A                 | C | A | C | A | A | G | A | G | C | C                                | T | T | G | A | C | A | A | G | C | A | A | G | T | C | A | G | A | C | A | C | T | C | A | A | A | T | G | T | C | T | G | C | A | A | A | G | A | A | C | G | T | T | A | G | T | G | G |
| Mexico2016_1           | C                          | C | G | C | T | G | C | C | C | A | A                 | C | A | C | A | A | G | A | G | C | C                                | T | T | G | A | C | A | A | G | C | A | A | T | C | A | G | A | C | A | C | T | C | A | A | A | T | G | T | C | T | G | C | A | A | A | G | A | A | C | G | T | T | A | G | T | G | G |   |
| Mexico2016_2           | C                          | C | G | C | T |   |   |   |   |   |                   |   |   |   |   |   |   |   |   |   |                                  |   |   |   |   |   |   |   |   |   |   |   |   |   |   |   |   |   |   |   |   |   |   |   |   |   |   |   |   |   |   |   |   |   |   |   |   |   |   |   |   |   |   |   |   |   |   |   |

Figure S1. **Alignment primers/probes for ZIKV.** All primers/probes are in the 5' to 3' direction. Mismatches are highlighted with blue boxes. The antisense primer sequence is inversely complemented. This primer/probe set targets the envelope gene that is capable of detecting all isolates from Asia, South America, and Mexico. However, there are 1–7 mismatches that can alter the efficiency of the assay.





Figure S2. **Multiple alignment of leptospira species.** Multiple alignment of partial sequence of the 16S ribosomal RNA gene of leptospira species reported in GenBank. Identical bases are shaded the same color, asterisks show 100% identity in the different sequences. The BLAST match shows 87.38% identity with *L. Kmetyi* (KY411405.1) and ~ 80% for the other leptospira species.
